# Supplementary material
Source: PubMed Central journal article supplement (PMC7965164)
Supplement: 4016_table.pdf [file 4016_table.pdf]

**On-line Table: Morphologic and hemodynamic risk factors before and after aneurysm rupture**

| Indices<br>(Aneurysm at Risk)                                        | Case 1                     |                    | Case 2                      |                    | Case 3                      |                    | Case 4                      |                    |
|----------------------------------------------------------------------|----------------------------|--------------------|-----------------------------|--------------------|-----------------------------|--------------------|-----------------------------|--------------------|
|                                                                      | 4 Months before<br>Rupture | Rupture            | 12 Months before<br>Rupture | Rupture            | 20 Months before<br>Rupture | Rupture            | 24 Months before<br>Rupture | Rupture            |
| Qualitative morphologic risk factor<br>Blebs <sup>16,17</sup>        | No                         | Yes <sup>a</sup>   | Yes <sup>a</sup>            | Yes <sup>a</sup>   | No                          | Yes <sup>a</sup>   | No                          | Yes <sup>a</sup>   |
| Quantitative morphologic risk factor<br>AR (>1.6) <sup>2</sup>       | 1.17                       | 1.44               | 1.93 <sup>a</sup>           | 2.38 <sup>a</sup>  | 1.50                        | 1.32               | 2.16 <sup>a</sup>           | 2.68 <sup>a</sup>  |
| SR (>1.75) <sup>15</sup>                                             | 1.47                       | 1.88 <sup>a</sup>  | 3.58 <sup>a</sup>           | 3.66 <sup>a</sup>  | 3.58 <sup>a</sup>           | 4.09 <sup>a</sup>  | 2.08 <sup>a</sup>           | 3.42 <sup>a</sup>  |
| NSI (>0.16) <sup>15</sup>                                            | 0.48 <sup>a</sup>          | 0.34 <sup>a</sup>  | 0.34 <sup>a</sup>           | 0.27 <sup>a</sup>  | 0.27 <sup>a</sup>           | 0.26 <sup>a</sup>  | 0.40 <sup>a</sup>           | 0.34 <sup>a</sup>  |
| AVSV (≥0.5) <sup>4</sup>                                             | 0.29                       | 0.42               | 0.38                        | 0.47               | 0.51 <sup>a</sup>           | 0.56 <sup>a</sup>  | 0.46                        | 0.37               |
| AASA (≤0.86) <sup>4</sup>                                            | 0.66 <sup>a</sup>          | 0.68 <sup>a</sup>  | 0.63 <sup>a</sup>           | 0.65 <sup>a</sup>  | 0.69 <sup>a</sup>           | 0.73 <sup>a</sup>  | 0.79 <sup>a</sup>           | 0.63 <sup>a</sup>  |
| Qualitative hemodynamic risk factor<br>Inflow jet size <sup>14</sup> | Large                      | Small <sup>a</sup> | Small <sup>a</sup>          | Small <sup>a</sup> | Small <sup>a</sup>          | Small <sup>a</sup> | Large                       | Small <sup>a</sup> |
| Impingement size <sup>14</sup>                                       | Large                      | Small <sup>a</sup> | Small <sup>a</sup>          | Small <sup>a</sup> | Large                       | Large              | Large                       | Large              |
| Complex flow pattern <sup>14</sup>                                   | No                         | Yes <sup>a</sup>   | Yes <sup>a</sup>            | Yes <sup>a</sup>   | No                          | Yes <sup>a</sup>   | No                          | Yes <sup>a</sup>   |
| Quantitative hemodynamic risk factor<br>NWSS (<0.39) <sup>15</sup>   | 1.52                       | 1.54               | 1.49                        | 1.29               | 1.95                        | 2.13               | 1.95                        | 2.45               |
| MWSS (<2.40) <sup>15</sup>                                           | 2.45                       | 2.16 <sup>a</sup>  | 1.78 <sup>a</sup>           | 2.79               | 2.82                        | 3.25               | 2.35 <sup>a</sup>           | 2.37 <sup>a</sup>  |
| Pulsatility index <sup>8</sup>                                       | 2.88 <sup>a</sup>          | 2.68 <sup>a</sup>  | 2.96 <sup>a</sup>           | 2.97 <sup>a</sup>  | 1.69 <sup>a</sup>           | 1.65 <sup>a</sup>  | 3.00 <sup>a</sup>           | 2.99 <sup>a</sup>  |

**Note:**—AR indicates aspect ratio; NWSS, normalized wall shear stress; MWSS, maximum wall shear stress.

<sup>a</sup> Depicted rupture risk.
